# Supplementary material for: Femto-second laser beam with a low power density achieved a two-photon photodynamic cancer therapy with quantum dots
Source: Royal Society of Chemistry journal article supplement (doi:10.1039/c3tb20928h), 2013-01-01
Supplement: c3tb20928h.pdf [file c3tb20928h.pdf]

## Supporting Information

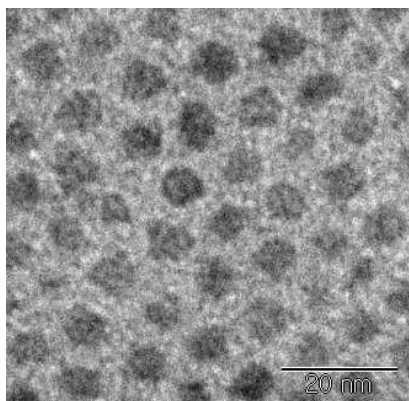

**Figure S1.** A TEM image of QDs, measured by a TEM machine (JEOL JEM-1011, Japan) at 80 kV (magnification x 600000).

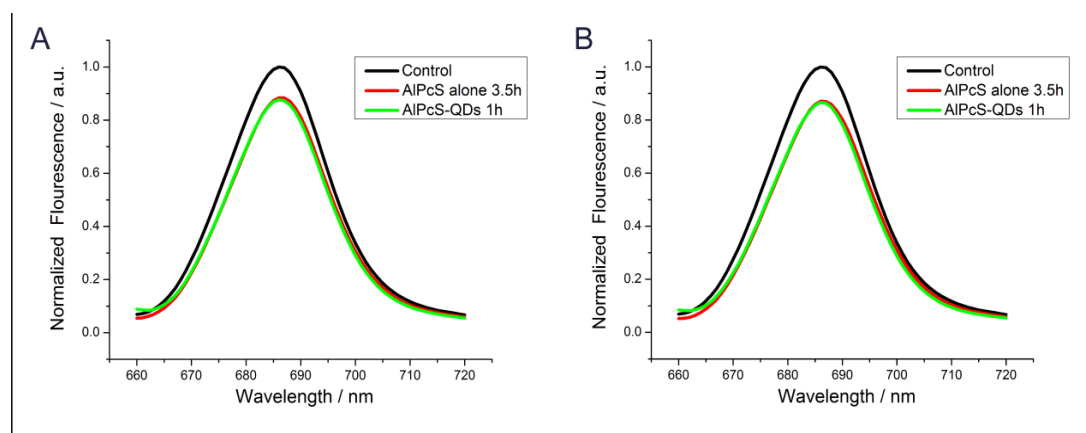

**Figure S2.** The fluorescence measurements of the medium solutions collected from the cell dishes after  $5\mu\text{M}$  free AlPcS (3.5 h) or QD-AlPcS ( $0.1\mu\text{M} - 5\mu\text{M}$ ) (1 h) incubations for KB cells (A) and Hela cells (B). Excitation: 650 nm. Control curves give the fluorescence intensities of original AlPcS ( $5\mu\text{M}$ ) and QD-AlPcS ( $0.1\mu\text{M} - 5\mu\text{M}$ ) in medium solutions (before the incubation for cells).
